# Supplementary material
Source: MDPI journal article supplement (https://www.mdpi.com/2073-4395/14/3/589)
Supplement: s1 [file s1]

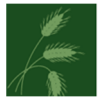

# Photosystem II Tolerance to Excess Zinc Exposure and High Light Stress in *Salvia sclarea*

Michael Moustakas <sup>1,\*</sup>, Anelia Dobrikova <sup>2</sup>, Ilektra Sperdouli <sup>3</sup>, Anetta Hanć <sup>4</sup>, Julietta Moustaka <sup>5</sup>, Ioannis-Dimosthenis S. Adamakis <sup>6</sup> and Emilia Apostolova <sup>2</sup>

**Table S1. Definitions of the chlorophyll fluorescence parameters used in the experiments**

| Parameter     | Definition                                                                                                                                                                                                  | Calculation                                                                                                                                                                           |
|---------------|-------------------------------------------------------------------------------------------------------------------------------------------------------------------------------------------------------------|---------------------------------------------------------------------------------------------------------------------------------------------------------------------------------------|
| $F_v/F_m$     | Maximum efficiency of PSII photochemistry                                                                                                                                                                   | $(F_m - F_o)/F_m$                                                                                                                                                                     |
| $\Phi_{PSII}$ | Effective quantum yield of PSII photochemistry                                                                                                                                                              | $(F_m' - F_s)/F_m'$                                                                                                                                                                   |
| $\Phi_{NPQ}$  | Quantum yield of regulated non-photochemical energy loss in PSII                                                                                                                                            | $F_s/F_m' - F_s/F_m$                                                                                                                                                                  |
| $\Phi_{NO}$   | Quantum yield of nonregulated energy loss in PSII                                                                                                                                                           | $F_s/F_m$                                                                                                                                                                             |
| $F_v'/F_m'$   | Efficiency of open PSII reaction centers                                                                                                                                                                    | $(F_m' - F_o')/F_m'$                                                                                                                                                                  |
| $F_v/F_o$     | Efficiency of the oxygen evolving complex (OEC) on the donor side of PSII                                                                                                                                   | $(F_m - F_o)/F_o$                                                                                                                                                                     |
| ETR           | Electron transport rate                                                                                                                                                                                     | $\Phi_{PSII} \times PAR \times c \times \text{abs}$ , where PAR is the photosynthetically active radiation, c is 0.5, and abs is the total light absorption of the leaf taken as 0.84 |
| qp            | Photochemical quenching, representing the redox state of quinone A ( $Q_A$ ), or in other words the fraction of PSII reaction centers in open state based on the “puddle” model for the photosynthetic unit | $(F_m' - F_s)/(F_m' - F_o')$                                                                                                                                                          |
| NPQ           | Non-photochemical quenching reflecting the dissipation of excitation energy as heat                                                                                                                         | $(F_m - F_m')/F_m'$                                                                                                                                                                   |
| EXC           | Excess excitation energy                                                                                                                                                                                    | $(F_v/F_m - \Phi_{PSII})/F_v/F_m$                                                                                                                                                     |
